# Supplementary material for: The T6SS-Dependent Effector Re78 of Rhizobium etli Mim1 Benefits Bacterial Competition
Source: MDPI journal article supplement (doi:10.3390/biology12050678), 2023-05-04
Supplement: s1 [file s1]

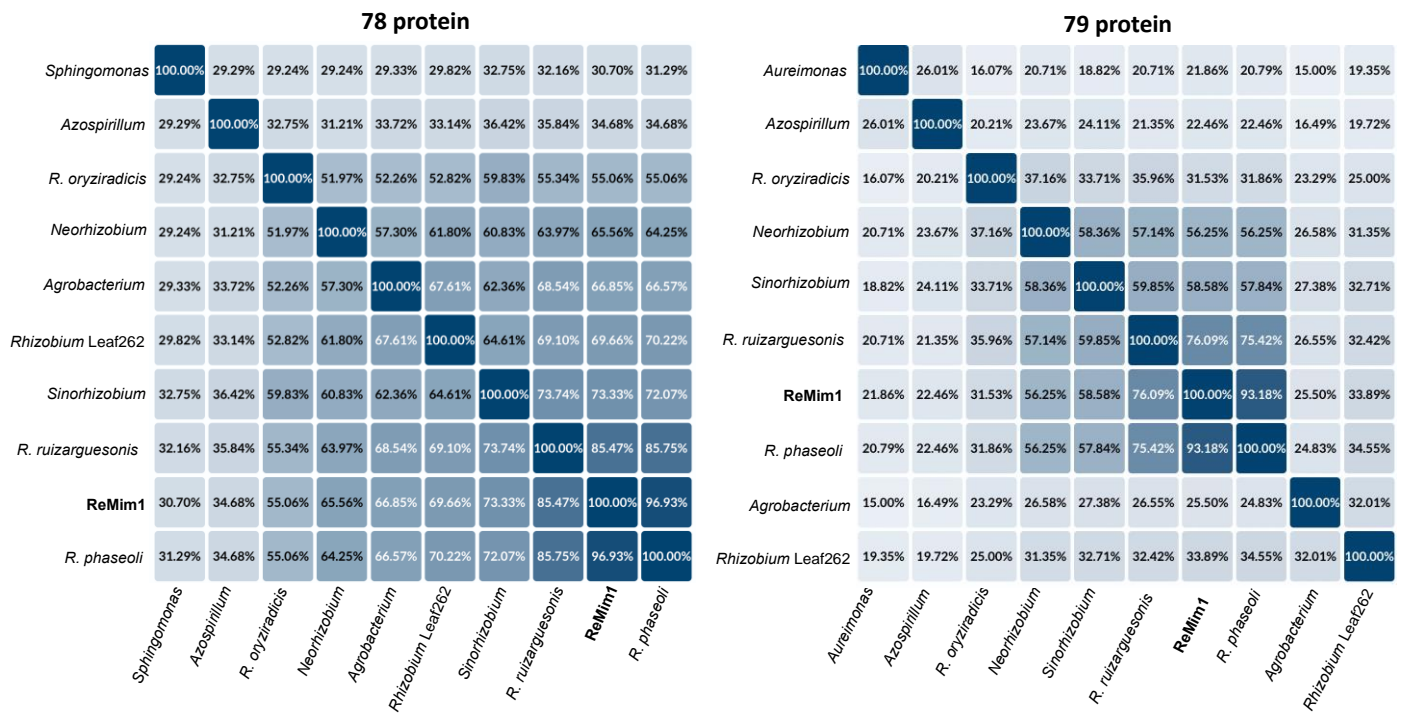

**Figure S1.** Heat map of the average amino acids identity (%) of proteins homologous to Re78 (REMIM1\_PF00478) and Re79 (REMIM1\_PF00479) of *Rhizobium etli* Mim1. The alignments were performed using ClustalW, version 1.2.4. of UniprotKB webserver.

(a)

|                                       |             |             |             |             |            |     |
|---------------------------------------|-------------|-------------|-------------|-------------|------------|-----|
| <i>R. etli</i> Mim1 Re78 (AGS26143.1) | MIVSAATERL  | NDILVELPKY  | KSQWEANVSS  | PYVRAYDLAI  | DNFQKTTKAC | 50  |
| <i>Neorhizobium</i> (CDN51818.1)      | MIVASANQRL  | GDILVKLPKY  | KSQWELNVAS  | PYVRAYDAV   | LSYNNEMKAC | 50  |
| <i>Sinorhizobium</i> (APG87637.1)     | MIVSSATDRL  | TDILVELPKY  | KSQWQSNVAN  | PYVRAYDLAV  | ENFQRTLKAC | 50  |
| <i>R. phaseoli</i> (ANMO8143.1)       | --MSAATERL  | NDILVELPKY  | KSQWEANVSS  | PYVRAYDLAI  | DNFQKTTKAC | 48  |
| <i>Agrobacterium</i> (WP_027675286.1) | --MSLATDRL  | NNILIELPKY  | KSQWQLNVAS  | PYVRAYDLAI  | DNYNKKMQEQ | 48  |
| <i>R. ruizarguesonis</i> (NKQ86457.1) | --MSAATDRL  | NDILIELPKY  | KSQWETNVAN  | PYVRAYDLAI  | DNYQKTTKAC | 48  |
| <i>R. oryzae</i> (WP_075641707)       | --MSSAKDRL  | TSIMDELDDK  | KSQWEVSVVS  | PYVRSYDFAY  | NNYQNTLKAC | 48  |
| <i>Rhizobium</i> (WP_062451316)       | --MSLAKERL  | NNILIELPKY  | ESQWESNIVL  | PYSRAYDLAI  | YLNKNVTKEQ | 48  |
| <i>Sphingomonas</i> (WP_156477649)    | -----MADRL  | QTYRNQVSDA  | VDAAQANVCN  | PYIIAYNTAY  | KSADVFFKKQ | 45  |
| <i>Azospirillum</i> (WP_089286101)    | -----MSDEI  | RNYLDELEAK  | AIRWRIFCR-  | DYASAYHLAH  | DQYKATWAAQ | 44  |
| <i>R. etli</i> Mim1 Re78 (AGS26143.1) | EARDRLAEL   | FVFSASILTQ  | SIMMAAFATT  | SVRVLAGRAA  | LSVICNNNLN | 100 |
| <i>Neorhizobium</i> (CDN51818.1)      | GERDRATAEM  | FVLAASILTQ  | SVMMAAFATT  | SVRVLAGRAI  | VRVICNNNLN | 100 |
| <i>Sinorhizobium</i> (APG87637.1)     | EARDKMTAEL  | FVFAASVLSG  | SVLMAAFATA  | SLRVLAGRAA  | LRVVCNNNLN | 100 |
| <i>R. phaseoli</i> (ANMO8143.1)       | EARDRLAEL   | FVFSASILTQ  | SIMMAAFATT  | SVRVLAGRAA  | LSVICNNNLN | 98  |
| <i>Agrobacterium</i> (WP_027675286.1) | AARDKMAEL   | FVMSASILTQ  | SVMMAVFATT  | SLRTLAGRAA  | LRVICNNNLN | 98  |
| <i>R. ruizarguesonis</i> (NKQ86457.1) | EARDRLAEL   | FVFSASVLTG  | SIMMAAFATT  | SVRVLAGRTA  | LRVICNNNLN | 98  |
| <i>R. oryzae</i> (WP_075641707)       | VARDKMGAE   | LVTAGVLSG   | SVLMAAFASS  | SLRVLAGRAL  | LRTICNNNLN | 98  |
| <i>Rhizobium</i> (WP_062451316)       | EARDKLKAE   | FVMSASILTQ  | SVMMAAFATT  | SLRVLAGRAA  | LHVICNNNLN | 98  |
| <i>Sphingomonas</i> (WP_156477649)    | DDSDKARAE   | FVTAAAILPG  | SILMATAATS  | SLRVIANRTA  | VRLLAGRSTS | 95  |
| <i>Azospirillum</i> (WP_089286101)    | EKSDKEKAE   | IVLALSVAAS  | TVLMAAFATN  | SLRVLAGRAA  | LNVICNNNLN | 94  |
| <i>R. etli</i> Mim1 Re78 (AGS26143.1) | RTFNVMHAAA  | SNKVVMFALG  | GVLDEAKKLA  | NKQVTSAAEK  | LTSSAPVASA | 150 |
| <i>Neorhizobium</i> (CDN51818.1)      | RTFNLMAAAN  | NNKAFMFALG  | GVLDEAKKVA  | NKQVTKLVEG  | LTSTGTQISA | 150 |
| <i>Sinorhizobium</i> (APG87637.1)     | RTFDLMHAAA  | SNKVMFALG   | GILDEAKKFA  | GKQITSAAEK  | LTSSAPIASS | 150 |
| <i>R. phaseoli</i> (ANMO8143.1)       | RTFNVMHAAA  | SNKVVMFALG  | GVLDEAKKLA  | NKQVTSAAEK  | LTSSAPVAAA | 148 |
| <i>Agrobacterium</i> (WP_027675286.1) | RTFNAFHAVS  | ESKVMFALG   | GVLDEVKKLA  | GKHVTAAVEG  | LTSSDAIASA | 148 |
| <i>R. ruizarguesonis</i> (NKQ86457.1) | RTFDLMHAAA  | TSKPMFALG   | GVLDEAKKLA  | NKQVTSAAEK  | LTSSAPIASA | 148 |
| <i>R. oryzae</i> (WP_075641707)       | RTFDVAVHVT  | NNKAMFALG   | SVLDKAKGIA  | GQHITAAVEN  | FTVRTSGGQS | 148 |
| <i>Rhizobium</i> (WP_062451316)       | RTFEAMRAAS  | ANKALMFALG  | SVLDEAKKLA  | GKQVTSAVEG  | LVSSASIASA | 148 |
| <i>Sphingomonas</i> (WP_156477649)    | RALGVYNABA  | SNATATFAIG  | KALDIVKDET  | GKAIKDSVVK  | TMSNTRDLLA | 145 |
| <i>Azospirillum</i> (WP_089286101)    | RTFNALHLVS  | NNKAMFALG   | AVMDAADAKA  | KKYIEEKAGT  | LTRSAPTPAV | 144 |
| <i>R. etli</i> Mim1 Re78 (AGS26143.1) | PTALNFKTRI  | DDFIINHVC   | VHEFIRGVQQ  | DNTISEAGKS  | RLADLVGQTP | 200 |
| <i>Neorhizobium</i> (CDN51818.1)      | PTSVNYESRL  | MDFIRVSHIC  | THSFIEGVKE  | DNSISETHKA  | QVADMAARIP | 200 |
| <i>Sinorhizobium</i> (APG87637.1)     | PTAINFLTRI  | EDFINVNHC   | VHEFIAGVRD  | DRAISETDKL  | KVADLVGKTP | 200 |
| <i>R. phaseoli</i> (ANMO8143.1)       | PTALNFKTRI  | DDFIINHVC   | VHDFVRGVQH  | DNTISEAGKS  | RLADLVQATP | 198 |
| <i>Agrobacterium</i> (WP_027675286.1) | PTALNFLTLM  | EDFINVNHC   | VHNFVQGVVD  | DASISDANKT  | HIAELVGKTP | 198 |
| <i>R. ruizarguesonis</i> (NKQ86457.1) | PTALNFMTRI  | ADFIDTNHC   | VHDFVRGVQQ  | DNSISEANKS  | RLADLVGKTP | 198 |
| <i>R. oryzae</i> (WP_075641707)       | QTSVNFTRL   | QDFVNVSFIA  | VHEFVTGVVN  | DNSIKESDKL  | KLADMVEATP | 198 |
| <i>Rhizobium</i> (WP_062451316)       | PTGLNFESRM  | KTFVNDNHC   | VHSFVQGVVD  | DGSLKDDDKM  | HIAELATKMP | 198 |
| <i>Sphingomonas</i> (WP_156477649)    | TDPLNRDKQL  | NSWLNHKLK   | AYDAADAIER  | SRMSERDKQ   | RAYDLLRAAP | 195 |
| <i>Azospirillum</i> (WP_089286101)    | TNPAVLQNDL  | INYVESNQLY  | AMEVAFAIRD  | DKSLSEADRA  | ILVGSGLKRA | 194 |
| <i>R. etli</i> Mim1 Re78 (AGS26143.1) | FCNPPESSRV  | DENRLSQKME  | LLFYMSAVLD  | SDKLVITYAPS | TGGTVGGVGR | 250 |
| <i>Neorhizobium</i> (CDN51818.1)      | FCNPPESSSI  | DEPKLANKME  | LLFYMSVLD   | SDRLVITYAPA | TGGSFGGMGQ | 250 |
| <i>Sinorhizobium</i> (APG87637.1)     | FCNPPEAGRRV | DENRLSQKME  | LLFYMSAVMD  | SDRLVTFVFP  | TGGSVPGTAR | 250 |
| <i>R. phaseoli</i> (ANMO8143.1)       | FCNPPESSRV  | DENRLSQKME  | LLFYMSAVLD  | SDKLVITYAPS | TGGTVGGIGR | 248 |
| <i>Agrobacterium</i> (WP_027675286.1) | FCNPPEARRV  | DENRLSQKME  | LLFYMDAVLE  | SDKLVKFASV  | TSSTTMLL-Q | 247 |
| <i>R. ruizarguesonis</i> (NKQ86457.1) | FCNPPESSRV  | DENRLSRKME  | LLFYMSAVLD  | SDKLVITYVPA | TGGTVGGMGR | 248 |
| <i>R. oryzae</i> (WP_075641707)       | FWLPPRANRV  | DENKLAQKME  | LLFYMTSVLD  | SDTLVRHAPS  | IGNGIGGGIG | 248 |
| <i>Rhizobium</i> (WP_062451316)       | FCNPPESSRI  | DENRLSQKME  | LLFYMDAVLE  | SDKLVITYAPA | SGERAMG--R | 246 |
| <i>Sphingomonas</i> (WP_156477649)    | IANKPENG-KI | DPARLSPKIE  | LGIFYMLWLD  | SDELVTQAP   | AGPYGGGG-- | 242 |
| <i>Azospirillum</i> (WP_089286101)    | LFKPEVN-EI  | KRERLTDHIE  | LSLHMSAMLD  | SDFLVDIPMH  | EMSTAGGLGS | 243 |
| <i>R. etli</i> Mim1 Re78 (AGS26143.1) | DIEYSKKAIP  | QLPSAT-DYP  | KSISPRLTGR  | PFQPYDPGQR  | IEYDNIGSVV | 299 |
| <i>Neorhizobium</i> (CDN51818.1)      | DVEYSRKIS   | QMPSTNGHY   | KAASPKFVGR  | PFVPPYDPGQR | IEYENIGSGI | 300 |
| <i>Sinorhizobium</i> (APG87637.1)     | ELVLARKKIP  | QMPSSA-DYP  | RETAPRLTGK  | LLQPFEPGTR  | IEYSNIGSAV | 299 |
| <i>R. phaseoli</i> (ANMO8143.1)       | DIEYKKAIP   | QLPSAT-DYP  | KSISPRLTGR  | PFQPYDPGQR  | IEYDNIGSVV | 297 |
| <i>Agrobacterium</i> (WP_027675286.1) | DVEFSRTPIA  | QLPSST-DYP  | REIGPQSGGI  | PITSKNIGQR  | VKYENLGSQI | 296 |
| <i>R. ruizarguesonis</i> (NKQ86457.1) | DIEYSKNAIP  | QLPSAT-DYP  | KATSPRFIGR  | PLQPFEPGQR  | VEYDNIGSVV | 297 |
| <i>R. oryzae</i> (WP_075641707)       | EGIRSKERIN  | QMPSTNGHY   | KAASPKFVGR  | PFVPPYDPGQR | IEYENIGSGI | 295 |
| <i>Rhizobium</i> (WP_062451316)       | DVEYSGKPS   | QMPSSA-NYP  | KAIAPKFTGR  | PFSPYDPGQR  | VEYNNIGSAV | 295 |
| <i>Sphingomonas</i> (WP_156477649)    | --RYSSKPID  | ALPSAA-DYP  | R-----GN    | TDPKRGPIQW  | VGVTRPGGDV | 282 |
| <i>Azospirillum</i> (WP_089286101)    | VFGAKERIP   | QLPSAS-DYP  | RGTPFR---T  | SLGVVHAQVS  | VRVERPGPIV | 289 |
| <i>R. etli</i> Mim1 Re78 (AGS26143.1) | RERINTLSRL  | TGNSSEFYPEQ | NS-VEKLFID  | PTSGAQMVKA  | EQIINRISAD | 348 |
| <i>Neorhizobium</i> (CDN51818.1)      | RDRINKLSIS  | TGNGPFYPNQ  | SF-VERKLFID | PTGHAQMVKA  | EQIINKLYND | 349 |
| <i>Sinorhizobium</i> (APG87637.1)     | RERIDTSLRQ  | YGGSPFYPQ   | NF-AEKILID  | PTGRAQMIRA  | EQIINRLSAD | 348 |
| <i>R. phaseoli</i> (ANMO8143.1)       | RERINTLSRL  | TGNSSEFYPEQ | NS-LEKLFID  | PTSGAQMAKA  | EQIINRLSAD | 346 |
| <i>Agrobacterium</i> (WP_027675286.1) | RQRIDTSLKL  | TGNSSEFYPEQ | SA-VER-FFD  | PTGNAQLLKA  | EQIINRLSIE | 344 |
| <i>R. ruizarguesonis</i> (NKQ86457.1) | RDRINTLSRL  | TGNSSEFYPEQ | NF-AEKLLID  | PTGSQLAKA   | EQIINRLSTE | 346 |
| <i>R. oryzae</i> (WP_075641707)       | RARIDTSLRA  | YGGSPFYPQ   | SIGMRIAGND  | PTGREQMVKA  | EHIISRLSAQ | 345 |
| <i>Rhizobium</i> (WP_062451316)       | RERIDMLSRM  | TGNSSEFYPEQ | NF-AERLLID  | PTGNAQMVKA  | EQIINRLSAS | 344 |
| <i>Sphingomonas</i> (WP_156477649)    | EDQIDKVRHQ  | VRGSAFYAPG  | GW-FGKSDVN  | QARLKEVAEA  | ERVLAWLSDK | 331 |
| <i>Azospirillum</i> (WP_089286101)    | QTKIDELNGR  | IFNEKEFSAS  | SWQGGQNGPM  | P----ALVRA  | ETTLNRLAEA | 335 |
| <i>R. etli</i> Mim1 Re78 (AGS26143.1) | ARPKQLTDVR  | MI          | 360         |             |            |     |
| <i>Neorhizobium</i> (CDN51818.1)      | ARPKQLTDVR  | MI          | 361         |             |            |     |
| <i>Sinorhizobium</i> (APG87637.1)     | ARPKQLVDVR  | MI          | 360         |             |            |     |
| <i>R. phaseoli</i> (ANMO8143.1)       | ARPKQLTDVR  | MI          | 358         |             |            |     |
| <i>Agrobacterium</i> (WP_027675286.1) | ARPKELTDVK  | VI          | 356         |             |            |     |
| <i>R. ruizarguesonis</i> (NKQ86457.1) | ARPKQLTDVR  | MI          | 358         |             |            |     |
| <i>R. oryzae</i> (WP_075641707)       | TRPKQLSDVF  | MM          | 357         |             |            |     |
| <i>Rhizobium</i> (WP_062451316)       | ARPKDITDVR  | MM          | 356         |             |            |     |
| <i>Sphingomonas</i> (WP_156477649)    | TQPLAPLGLR  | T-          | 342         |             |            |     |
| <i>Azospirillum</i> (WP_089286101)    | SRPLQLDAAR  | V-          | 346         |             |            |     |

|     |                                |             |            |            |             |             |             |     |
|-----|--------------------------------|-------------|------------|------------|-------------|-------------|-------------|-----|
| (b) | R. etli Mim1 Re79 (AGS26144.1) | --MLLTGLIK  | QGFLGRMRWP | LAAVTIVGVM | AASAAAMVGA  | SGSTDQSLIQ  | IEAVSSRLSA  | 58  |
|     | Neorhizobium (CDN51817.1)      | -MKLISFFSP  | SVRTGPILRQ | SRNVAVAFAM | AVWAPAFAAA  | SDEIDETLLQ  | IERVGPRLSA  | 59  |
|     | Sinorhizobium (APG87638.1)     | -----       | -----      | -----      | -----       | MIAGT       | SNPIDQSLVQ  | 25  |
|     | R. phaseoli (ANM08142.1)       | --MLLTDFLK  | RGLMGRMRWS | LVAAFTGAM  | VASAAAMVGA  | SGSTDQSLLE  | IEAVSSRLSA  | 58  |
|     | Agrobacterium (WP_027675287.1) | MLFNDFTSHV  | KKICLLKLCA | FACLVVCILL | TASHVSADQA  | NNTIDSVVIR  | AERLDQRLAD  | 60  |
|     | R. ruizarguesonis (NKQ86458.1) | -----       | ---MGRMRWP | LIAAALVCM  | AASAGMVGA   | SDTTDQSLIQ  | IEQVASRLSG  | 47  |
|     | R. oryzae (WP_175577311.1)     | -----       | --MIRGLKHS | IRGGLCLGGM | GMLSPVAACA  | DPSIDASLVQ  | IEQVGERVAN  | 48  |
|     | Rhizobium (WP_062451254.1)     | MMLLVDTVAV  | LNRVRKVTFI | IAAPVLAIML | TGCDAGAESS  | KSSVDASLLR  | AERVDERLAL  | 60  |
|     | Azospirillum (WP_143270660.1)  | -----M      | RQELSLLLKW | SGLLLVLTAL | LLAGCSRSGE  | AEKSDETMMQ  | MEQVASYLQS  | 51  |
|     | Aureimonas (WP_183201854.1)    | -----       | -----MRWT  | TAALALVGVL | AAILPGRAMA  | DPAGDERYLR  | LEDAERYVAG  | 44  |
|     | R. etli Mim1 Re79 (AGS26144.1) | TPAAVETVAK  | AAADRSVPTS | -DAQPLLETA | ARSSFADAGM  | LAEISKAVAE  | AGSDA-VDPR  | 116 |
|     | Neorhizobium (CDN51817.1)      | MPSEVENVVK  | AATDRGNDEA | SKAGPILEPV | VRASFDPKGM  | VAEISHSLAE  | VEGGK-IDPA  | 118 |
|     | Sinorhizobium (APG87638.1)     | APSAVKTVSK  | ALAENGNAEV | PAAEALLETA | VHSSFDESEM  | GAAILKNIGE  | VDGGS-IDPE  | 84  |
|     | R. phaseoli (ANM08142.1)       | TPGAVGSVAK  | AAADRSVPAS | -DAQPLLETA | ARSSFADAGM  | FAEISKAVAE  | AGSDA-VDPR  | 116 |
|     | Agrobacterium (WP_027675287.1) | INAMVENSVA  | IEAAGTKLDV | AKTKPLMLKA | ISQKFDLLQM  | KRTIVAAIEA  | PDNDY-QNFK  | 119 |
|     | R. ruizarguesonis (NKQ86458.1) | TPAAVENVAK  | AAADRGISAT | SDAQPLLETA | ARSSFQVDSM  | FAEISKAVGE  | AGDDA-VDPK  | 106 |
|     | R. oryzae (WP_175577311.1)     | AGLLADNVLK  | YISDQEGLHD | KQADSMIESA | TRDAFNAQAF  | VTEIQNSMQN  | VGNSS-IDAQ  | 107 |
|     | Rhizobium (WP_062451254.1)     | PQALIRNAAS  | ARRDDKNADI | AKTEPLLISS | SEKAFDAGEM  | RKKILVIEA   | TPGGY-ADVA  | 119 |
|     | Azospirillum (WP_143270660.1)  | MPGLVDIVGG  | DVRKEFGAGV | DADLPLLRQS | VVKAFDPADL  | LARVRRELKA  | VDAGGGAIEP  | 111 |
|     | Aureimonas (WP_183201854.1)    | MAEFARMQGP  | LIEVSDRREL | PALAERGATL | AAQTEAVAGA  | RDAMLERLRK  | TPGEV---PV  | 101 |
|     | R. etli Mim1 Re79 (AGS26144.1) | AFAKAAAAWH  | EGQAKVARMY | QAQDQVAAKE | IETRLADPKD  | GPQIKALADL  | MAGPDLAVES  | 176 |
|     | Neorhizobium (CDN51817.1)      | TLAKAAAAFE  | DGRKKIAEMY | RSQDQAIKQ  | IEARIAGADD  | GPRIKQLADL  | MASPELAAET  | 178 |
|     | Sinorhizobium (APG87638.1)     | AFARAAAAFE  | EGRGKIARIY | EAQDQTAAKE | IEARLADPET  | GARLRQLTDL  | MAAPELAVES  | 144 |
|     | R. phaseoli (ANM08142.1)       | AFAKAAAAWH  | EGQAKVARMY | QAQDQVAAKE | IETRLADPKD  | GPQIKALADL  | MAGPDLAVES  | 176 |
|     | Agrobacterium (WP_027675287.1) | ALDKAVSALI  | VSYAQIDKIY | TDKDEVAGKS | IQARLGNPKT  | RETVDNVALN  | MASPKLAADA  | 179 |
|     | R. ruizarguesonis (NKQ86458.1) | AFAKVAAALE  | AGQAKIARMY | EAQDQTAAKD | IEMLANPDN   | GPRIQSALADL | MAGPDLAVDT  | 166 |
|     | R. oryzae (WP_175577311.1)     | RLAKIADDLN  | ASRKKIETLA | QSKGDAALQT | MDAEIVKKAD  | SPRVEQLAQL  | MASPDLALET  | 167 |
|     | Rhizobium (WP_062451254.1)     | AFDTATAALA  | DGYRAVDMKY | ADKDEDGFKK | IETRLASPEA  | KSTIEEVASL  | MASPDLALET  | 179 |
|     | Azospirillum (WP_143270660.1)  | AFLAAANDFI  | RTQSAVEAES | RVDPGKVIQS | ATDAYEVRAD  | KGRIDALAGA  | MAAADIQVEG  | 171 |
|     | Aureimonas (WP_183201854.1)    | AFDAIVARMR  | AVEAEFASRS | LEALQAGEAD | AVAHYEAREPD | RASIDAVDGA  | MAAPDLARET  | 161 |
|     | R. etli Mim1 Re79 (AGS26144.1) | AVTWQTMYYL  | LEALSSADAE | KLASVSQDKL | QSEMNGVIAS  | LRAR---SEN  | EKPLPKDMAR  | 233 |
|     | Neorhizobium (CDN51817.1)      | ALTAQVMYVS  | LEAFSDPNSA | ELASASSEKR | KSELGGVIAS  | LRDR---TEN  | EKPPVRDIAR  | 235 |
|     | Sinorhizobium (APG87638.1)     | AFTSQLMYAA  | MEAFSDPSAA | ELASSS---- | ---ETPHVIAS | LRSR---NEN  | EKPIAKDAAR  | 195 |
|     | R. phaseoli (ANM08142.1)       | AVTWQTMYYL  | LEALSSADAE | KLASVSQDKL | QSEMNGVIAS  | LRAR---SEN  | EKPLPKDMAR  | 233 |
|     | Agrobacterium (WP_027675287.1) | ASFQQAQVGA  | LKISSDPGIY | ELNEEDQKKF | LADLPNFLAN  | LRER---EVN  | QSAYSRVITE  | 236 |
|     | R. ruizarguesonis (NKQ86458.1) | AFTAQLMYLC  | LEALSNSDVE | TLASASKDKL | QSEMQGVISS  | LRSK---SEN  | EKPPVPKDIAR | 223 |
|     | R. oryzae (WP_175577311.1)     | AVTAQAMYYA  | VHAFNSDPS  | QFAALSQEQR | QDMPTQILSY  | LQKQ---TEN  | EKPPSKDANR  | 224 |
|     | Rhizobium (WP_062451254.1)     | AVTQQAISAV  | LTMETGSPAL | DPSSEEHKQL | KATLPSLLPE  | FRNR---PDQ  | GGAYSKEKAS  | 236 |
|     | Azospirillum (WP_143270660.1)  | TLLGLRLQGA  | AALRHLEKPV | LWQGLDDQGR | DRYADQFTRR  | TRAEG--DAN  | HSPPRYEIAR  | 229 |
|     | Aureimonas (WP_183201854.1)    | AVTGLRVKWI  | YETLLTGNDM | EMRAMTPALV | ETGIREVLDR  | TRAPDDPEYG  | APPLRKLVR   | 221 |
|     | R. etli Mim1 Re79 (AGS26144.1) | ADEKARLTFV  | LATMPPEPDL | VLTDFYESSG | GKAKRDALVE  | SYRRVSDQAN  | KQMLGQYFQA  | 293 |
|     | Neorhizobium (CDN51817.1)      | MEKARLTFV   | LALPKDDLS  | VLSDFYQSAE | GKAKRQALVE  | TYRQVSDQAN  | TRMLEKYFSA  | 295 |
|     | Sinorhizobium (APG87638.1)     | LEEQQQLSFI  | LATLSDEPDL | VLLDFYRSSG | GKTKRQALVD  | SYVKVSDQAN  | TKMLQAYFSA  | 255 |
|     | R. phaseoli (ANM08142.1)       | ADEKARLTFV  | LATMPPEPDL | VLTDFYESSG | GKAKRDALVE  | SYRRVSDQAN  | KQMLGQYFQA  | 293 |
|     | Agrobacterium (WP_027675287.1) | EYARNELSYA  | LATLSDDQLD | TKMFYSSPT  | GIAKTEALKK  | TYKDILSENT  | SIALDQYFRL  | 296 |
|     | R. ruizarguesonis (NKQ86458.1) | ANEKRLTFV   | LATLSPEPDL | VLTDFYESSG | GKAKRDALIA  | SYRQASDQAN  | TEMLGQYFQA  | 283 |
|     | R. oryzae (WP_175577311.1)     | ANEKRLGLA   | LATLSDDQIL | YLTNLYQSPE | GKAKRAALD   | RYKRLSTDAN  | QKMLQDYFTQ  | 284 |
|     | Rhizobium (WP_062451254.1)     | AFETAGLTFA  | LATLTDKDL  | ALKSFYAGSY | GKSKRQELLG  | AYQQVWDAAD  | TTMLTTYIEE  | 296 |
|     | Azospirillum (WP_143270660.1)  | FLAIQRLTII  | LLRLPEPSLK | ALDFYNSDL  | GKAKRKALVA  | AVAAQSDADT  | QMMVEYLRQ   | 289 |
|     | Aureimonas (WP_183201854.1)    | EQARMVKRMV  | LSHLPEADVA | ALAAFYASDV | GKAKRRALVE  | AFGARNDDEG  | ARFRQLLER   | 281 |
|     | R. etli Mim1 Re79 (AGS26144.1) | LAEYFKTHPR  | PQQQQ      | 308        |             |             |             |     |
|     | Neorhizobium (CDN51817.1)      | LAGEYFKTHPR | PQQQ-      | 309        |             |             |             |     |
|     | Sinorhizobium (APG87638.1)     | LANYLKTHPR  | PQQQ-      | 269        |             |             |             |     |
|     | R. phaseoli (ANM08142.1)       | LAEYFKTHPR  | PQQQQ      | 308        |             |             |             |     |
|     | Agrobacterium (WP_027675287.1) | IFAEQVKN--  | ----       | 304        |             |             |             |     |
|     | R. ruizarguesonis (NKQ86458.1) | LADYLKTHPR  | PQQQQ      | 298        |             |             |             |     |
|     | R. oryzae (WP_175577311.1)     | LADNLTKRKS  | NN--       | 296        |             |             |             |     |
|     | Rhizobium (WP_062451254.1)     | LAKQHPAAVK  | AQ--       | 308        |             |             |             |     |
|     | Azospirillum (WP_143270660.1)  | LR-----     | ----       | 291        |             |             |             |     |
|     | Aureimonas (WP_183201854.1)    | ERSRTP----  | ----       | 287        |             |             |             |     |

Figure S2. Complete alignment of Re78 and Re79 with homologous proteins. (a) Re78 (ReMim1 AGS26143.1) alignment showed 39 identical amino acids (red). (b) Re79 (ReMim1 AGS26144.1) alignment presented 11 identical amino acid (red). The amino acid position of residues is indicated on the right side of the sequences. The NCBI ID is shown on the left of each sequence.



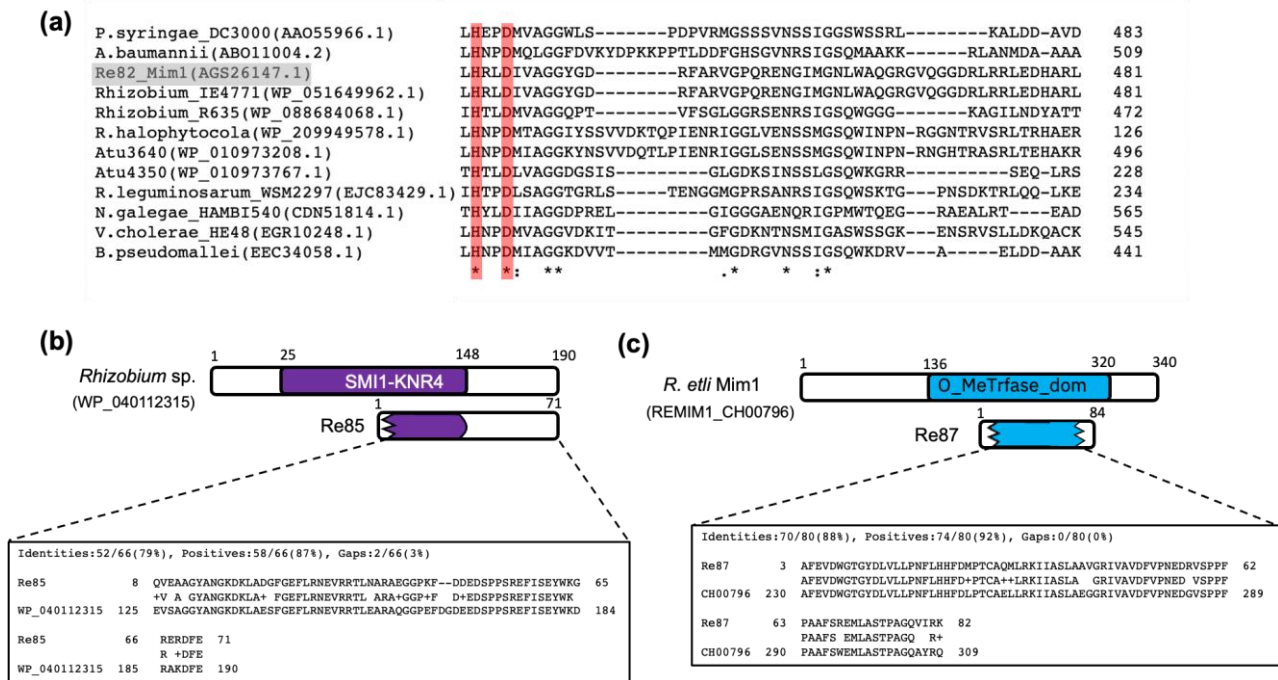

**Figure S3.** Relevant characteristics of the Re82, Re85 and Re87 proteins encoded in the T6SS cluster of ReMim1. (a) Partial sequence alignment of Re82 and members of a superfamily of T6SS-dependent DNase effectors. The HxxD catalytic motif is highlighted in red. Asterisks and dots indicate conserved amino acid and conservative changes, respectively. The amino acid position of residues shown is indicated on the right of the sequences. The NCBI ID are shown on the left of each sequence (b) Alignment of protein Re85 with a representative of a BLAST search, *Rhizobium* sp. (WP\_040112315). SMI1-KNR4 domain is highlighter in purple. (c) Alignment of protein Re87 with a representative of a BLAST search, *Rhizobium etli* Mim1 (REMIM1\_CH00796). O-methyltransferase domain is highlighted in blue. Organism names and protein accession numbers are on the left and the amino acid position in the alignments is indicated on each side of the sequences.

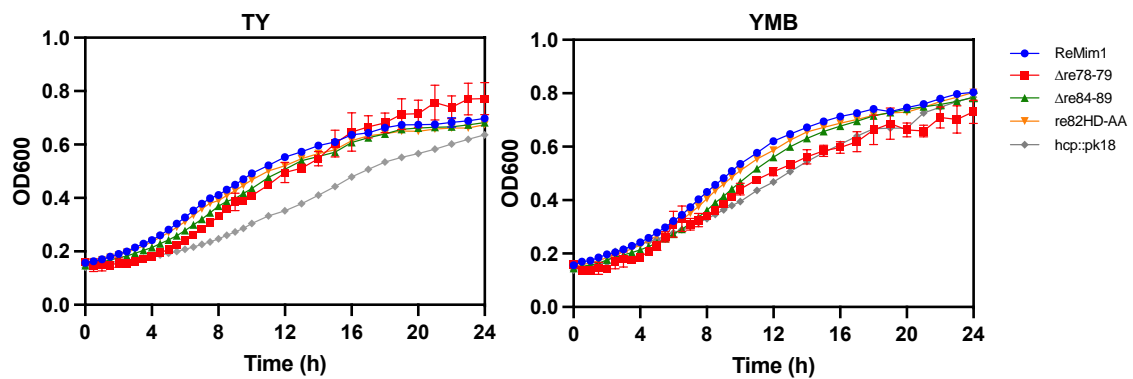

**Figure S4.** Growth curves of *Rhizobium etli* Mim1 strain and T6SS-derivative mutants in TY and YMB media at 28 °C.

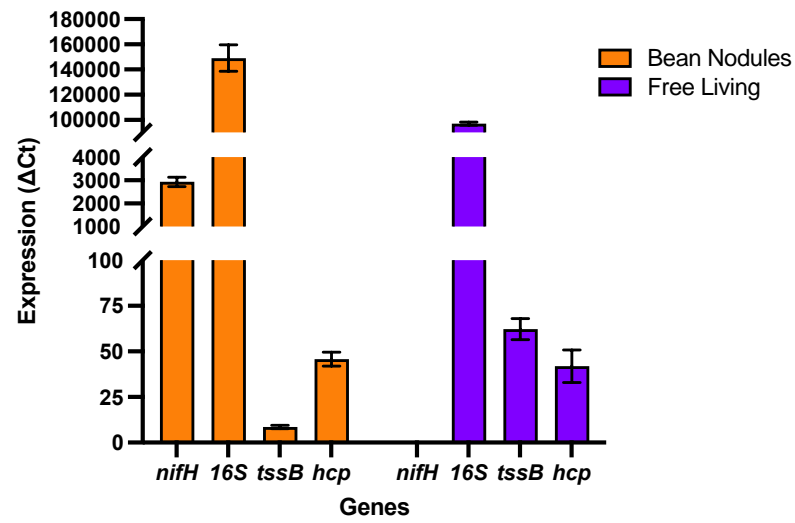

**Figure S5.** RT-qPCR analysis of T6SS genes *tssB*, *hcp* and *16S rRNA* gene (constitutive) and *nifH* gene (expressed in symbiotic condition). RNA from *tssB*, *hcp* and *16S rRNA* were analysed in free-living cells (TY medium) and RNA from *tssB*, *hcp* and *nifH* were analysed from bean nodules induced by *Rhizobium etli* Mim1, 28 dpi. Data were normalized using expression of *rpoD* gene. Bars values are average of two biological assays with three replicates.

**Table S1.** Bacterial strains and plasmids, related to Experimental Procedures.

| Strain or Plasmid                   | Relevance Characteristics                                                                                         | Reference or Source  |
|-------------------------------------|-------------------------------------------------------------------------------------------------------------------|----------------------|
| <i>Escherichia coli</i>             |                                                                                                                   |                      |
| DH5α                                | Host for DNA cloning                                                                                              | Gibco-BRL            |
| BL21(DE3)                           | Host for protein expression                                                                                       | New England Biolabs  |
| S17.1                               | Host for conjugation                                                                                              | [72]                 |
| HB101                               | Host for conjugation, triparental mating                                                                          | [73]                 |
| <i>Rhizobium</i>                    |                                                                                                                   |                      |
| <i>Rhizobium etil</i> Mim1 (ReMim1) | Wild-type strain able to induce nodules in <i>Phaseolus vulgaris</i> plants                                       | [74]                 |
| hcp::pk18                           | ReMim1 <i>hcp</i> mutant, Km <sup>r</sup>                                                                         | [21]                 |
| Δre78-79                            | ReMim1 <i>re78</i> and <i>re79</i> deletion mutant                                                                | This work            |
| re82HD-AA                           | ReMim1 derivative by site-directed mutagenesis in amino acids H431 and D434 has been substituted for Alanines     | This work            |
| Δre84-89                            | ReMim1 derivative with <i>re84</i> to <i>re89</i> genes deleted                                                   | This work            |
| Plasmids                            |                                                                                                                   |                      |
| pCR2.1-TOPO                         | Vector for optimize cloning PCR products, Amp <sup>r</sup> , Km <sup>r</sup>                                      | Invitrogen           |
| TOPO.Re79StrepTag                   | pCR2.1-TOPO derivative containing <i>re79</i> gene                                                                | This work            |
| pCR2.1-P6                           | pCR2.1-TOPO derivative containing P6 region (1242-bp) of T6SS from ReMim1                                         | This work            |
| pSCA                                | Vector for optimize cloning PCR products, Amp <sup>r</sup> , Km <sup>r</sup>                                      | Agilent Technologies |
| pSCA-re82                           | pSCA derivative containing <i>re82</i> gene                                                                       | This work            |
| pSCA-HD→A                           | pSCA derivative containing <i>re82</i> H <sub>431</sub> A                                                         | This work            |
| pSCA-AD→A                           | pSCA derivative containing <i>re82</i> H <sub>431</sub> A-D <sub>434</sub> A                                      | This work            |
| pK18 <i>mobsacB</i> (pK18)          | Suicide vector; <i>sacB</i> gene for double crossover event selection, Km <sup>r</sup>                            | [75]                 |
| pK18 <i>mobsacB</i> .Δre78-79       | pK18 derivative to generate a <i>re78-79</i> deletion                                                             | This work            |
| pK18 <i>mobsacB</i> .Δre84-89       | pK18 derivative to generate a <i>re84-89</i> deletion                                                             | This work            |
| pK18 <i>mobsacB</i> .re82HDAA       | pK18 derivative to generate <i>re82</i> H <sub>431</sub> A-D <sub>434</sub> A                                     | This work            |
| pET22b(+)                           | T7 promoter vector with N-terminal signal peptide (PelB), Amp <sup>r</sup>                                        | Novagen              |
| pET22b.Re78SP                       | pET22b derivative expressing Re78 with a N-terminal PelB sequence                                                 | This work            |
| pET22b.Re78                         | pET22b derivative expressing Re78                                                                                 | This work            |
| pBAD33                              | Plasmid for cloning, L-arabinose inducible, araBAD promoter, Cm <sup>r</sup>                                      | [76]                 |
| pBAD33.Re79                         | pBAD33 expressing immunity protein Re79, Cm <sup>r</sup>                                                          | This work            |
| pLMB509                             | Broad-host range expression vector with a taurine inducible promoter, Gm <sup>r</sup>                             | [77]                 |
| pLMB509-Re79StrepTag                | pLMB509 derivative expressing Re79 with a C-terminal Strep-tag                                                    | This work            |
| pMP220                              | Cloning vector with a promoter-less <i>lacZ</i> gene, Tc <sup>r</sup>                                             | [78]                 |
| pMP220-PTssA                        | pMP220 cloned P6 of ReMim1 and <i>tssA</i> region, Tc <sup>r</sup>                                                | This work            |
| pMP220-PHcp                         | pMP220 cloned P6 of Remim1 and <i>tssH</i> region, Tc <sup>r</sup>                                                | This work            |
| pHC60                               | Green Fluorescent Protein (GFP) gene under a constitutive promoter, Tc <sup>r</sup>                               | [79]                 |
| pCMB13                              | Contains the <i>Discosoma</i> Red fluorescent protein (DsRed) gene under a constitutive promoter, Sp <sup>r</sup> | [80]                 |

Antibiotic Abbreviations: Amp (ampicillin), Km (kanamycin), Sp (spectinomycin), Tc (tetracycline), Gm (gentamicin), Cm (chloramphenicol).

**Table S2.** Primers used in this study, related to experimental procedures.

| Primer        | Sequence (5'-3')                                                | Use                                                                                                                     |
|---------------|-----------------------------------------------------------------|-------------------------------------------------------------------------------------------------------------------------|
| P78.F         | CCGGCCATATGATCGTGTGCGCTGCAACTGA                                 | Cloning of <i>re78</i> in pET22b without PelB                                                                           |
| P78.R         | CCGGGCTCGAGTTAATGGTGATGGTGATGGTGAATCATCCTGACATC                 |                                                                                                                         |
| P78sp.F       | CCGGGGGATCCGTCGGCTGCAACTGAGCGGCA                                | Cloning of <i>re78</i> with PelB (N-terminal)                                                                           |
| P78sp.R       | CCGGGCTCGAGTTAATGGTGATGGTGATGGTGAATCATCCTGACATC                 |                                                                                                                         |
| P79.F         | CCGGCCATATGCTGTTGACCGGTCTTATCAAG                                | Cloning of <i>re79</i> in pBAD33                                                                                        |
| P79.R         | CCGGCAGCGCTTTAATGGTGATGGTGATGGTGCTGCTGCTGTTGCGGCCGGGG           |                                                                                                                         |
| P79.NdeI      | CCGGGCATATGCTGTTGACCGGTCTTATC                                   | Cloning of <i>re79</i> in PCR2.1 TOPO and pLMB509                                                                       |
| P79.NdeIStrep | CCCGGCATATGTTACTTTTCGAACTGCGGGTGGCTCCAGCTAGCCTGCTGCTGTTGCG<br>G |                                                                                                                         |
| P78.1         | CCTACCAAGGTCAGCGATT                                             | Deletion of <i>re78</i> to <i>re79</i>                                                                                  |
| P78.2         | CACCAAACGTGGCTTGCCGTACTTGGGGAGTTCTACCAGA                        |                                                                                                                         |
| P79.3         | GGCAAGCCACGTTTGGTGCGCTGGCGGAGTATTCAA                            |                                                                                                                         |
| P79.4         | CGACCGAGGTCTTGTCATC                                             |                                                                                                                         |
| P84.1         | GCGAAAACGGGATTATGGGC                                            | Deletion of <i>re84</i> to <i>re89</i>                                                                                  |
| P84.2         | ACCCGCTTCATAGCGATCATCGGTCCAACG                                  |                                                                                                                         |
| P89.1         | TGATCGCTATGAAGCGGGTCGATTAGGAGG                                  |                                                                                                                         |
| P89.1         | GCTGGCGCGCAATACAATTA                                            |                                                                                                                         |
| P82.F         | GATTGGCAGGCTAGGCAGAT                                            | Site-directed mutagenesis in which amino acids H <sub>431</sub> and D <sub>434</sub> have been substituted for Alanines |
| P82.R         | TGAAGACGGGATTGTAGGCG                                            |                                                                                                                         |
| PH.A.F        | CTGGCCGCACTGGCACGCCTTGATATT                                     |                                                                                                                         |
| PH.A.R        | AATATCAAGGCGTGCCAGTGCGGCCAG                                     |                                                                                                                         |
| PD.A.F        | TGGCACGCCTTGCTATTGTGGCGGG                                       |                                                                                                                         |
| PD.A.R        | CCCGCCACAATAGCAAGGCGTGCCA                                       |                                                                                                                         |
| pMP220 F      | AGCTCCTGAAAATCTCGTCG                                            | Confirmation of P6 orientation in pMP220                                                                                |
| pMP220 R      | TAAAAAACCCCACTCCGGCAA                                           |                                                                                                                         |
| P6.1          | GTCGAGCATTGCCCGGT                                               | Amplification of ReMim1 P6 promoter region                                                                              |
| P6.2          | CCGACATCCGTGCGACA                                               |                                                                                                                         |
| 78.RT.F       | GAGCGTTTGAACGATATTCT                                            | qPCR of T6SS genes                                                                                                      |
| 78.RT.R       | CTGACATAGGGACTGGAAAC                                            |                                                                                                                         |
| 79.RT.F       | TGACGGAATTCTATGAGAGC                                            |                                                                                                                         |
| 79.RT.R       | GGGATGGGTCTTGAAATACT                                            |                                                                                                                         |
| 81.RT.F       | TTCTGCCAGAGAACCCAAAC                                            |                                                                                                                         |
| 81.RT.R       | CCATAGGCCTTACTCCAGCA                                            |                                                                                                                         |
| 82.RT.F       | GACGTAGATGATGTCGAGGA                                            |                                                                                                                         |
| 82.RT.R       | ACTGGTTCTTCTCTCGGTCT                                            |                                                                                                                         |
| 83.RT.F       | AGTGCTCTCGGACCTCTGAA                                            |                                                                                                                         |
| 83.RT.R       | CTCGACCCCTATACGGACAA                                            |                                                                                                                         |
| 84.RT.F       | CTATTTCCGAGACAGGAATG                                            |                                                                                                                         |
| 84.RT.R       | GACTTCAACTGCGAATGAAT                                            |                                                                                                                         |
| 85.RT.F       | GTTCTGCGCAACGAAGT                                               |                                                                                                                         |
| 85.RT.R       | GTTCCCGACCCCTCCAGTAT                                            |                                                                                                                         |
| 86.RT.F       | GGCAGTGGGTCTGGACATAG                                            |                                                                                                                         |
| 86.RT.R       | GATACGACTGCGGAGCACAC                                            |                                                                                                                         |
| 87.RT.F       | CTGCCTTCGAGGTAGATTGG                                            |                                                                                                                         |
| 87.RT.R       | CGATGATCTTTCGGAGCATT                                            |                                                                                                                         |
| 88.RT.F       | ACCGCACGCTATCAGCTC                                              |                                                                                                                         |
| 88.RT.R       | GTCGAGAACCGGCTTCAG                                              |                                                                                                                         |
| 89.RT.F       | GCTGCCGGATCATAGTCAAA                                            |                                                                                                                         |
| 89.RT.R       | GGCAGCAAGGTTTGAAAAGT                                            |                                                                                                                         |

---

|           |                        |
|-----------|------------------------|
| hcp.RT.F  | TTTCGGAAGTGATCCTCACC   |
| hcp.RT.R  | ATATAGGTGTCGCCGGGATT   |
| nifH.RT.F | GGTCTTCATGATGCCGAAGT   |
| nifH.RT.R | CTAGCCGAGAAGATCCATGC   |
| tssB.RT.F | AAGCTCCGTTCGTCCTTCT    |
| tssB.RT.R | ATCCGACACAGCCTCTCAAG   |
| 16S.RT.F  | ACGTGCTACAATGGTGGTGA   |
| 16S.RT.R  | CAGAGTGCAATCCGAACTGA   |
| rpoD.RT.F | GATGAAGTCGATCGGCAATCTG |
| rpoD.RT.R | GCTTCGACCATTTCCTTCTTG  |

---

**Table S3.** Proteomic analysis of Re78/79 from secretomes of *Rhizobium etli* Mim1 and hcp::pk18 mutant.

| Protein | Accession | MW<br>(kDa) | SignalP <sup>a</sup> | Score <sup>b</sup> |           | Peptides <sup>c</sup> |           | PSM <sup>d</sup> |           |
|---------|-----------|-------------|----------------------|--------------------|-----------|-----------------------|-----------|------------------|-----------|
|         |           |             |                      | ReMim1             | hcp::pk18 | ReMim1                | hcp::pk18 | ReMim1           | hcp::pk18 |
| Re78    | S5S7Y0    | 39.5        | No                   | 160.97             | 11.68     | 18                    | 2         | 54               | 4         |
| Re79    | S5SXD8    | 32.8        | Yes                  | 42.25              | 35.21     | 6                     | 6         | 14               | 13        |

<sup>a</sup>Signalpeptide identified by SignalP 5.0; <sup>b</sup>Measure of the goodness of fit of experimental peptide fragments to theoretical spectra; <sup>c</sup>Total number of distinct peptide sequences identified; <sup>d</sup>Relative Peptide-Spectrum-Match.
